# Supplementary material
Source: PubMed Central journal article supplement (PMC4427251)

**A**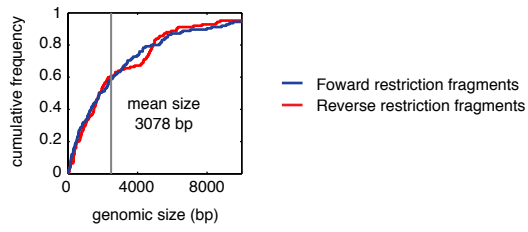**B**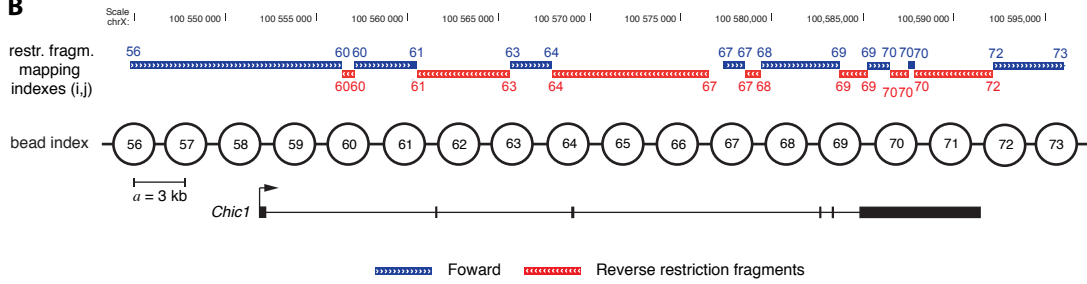

Supplement: NIHMS686568-supplement-Figure_S1.pdf [file NIHMS686568-supplement-Figure_S1.pdf]

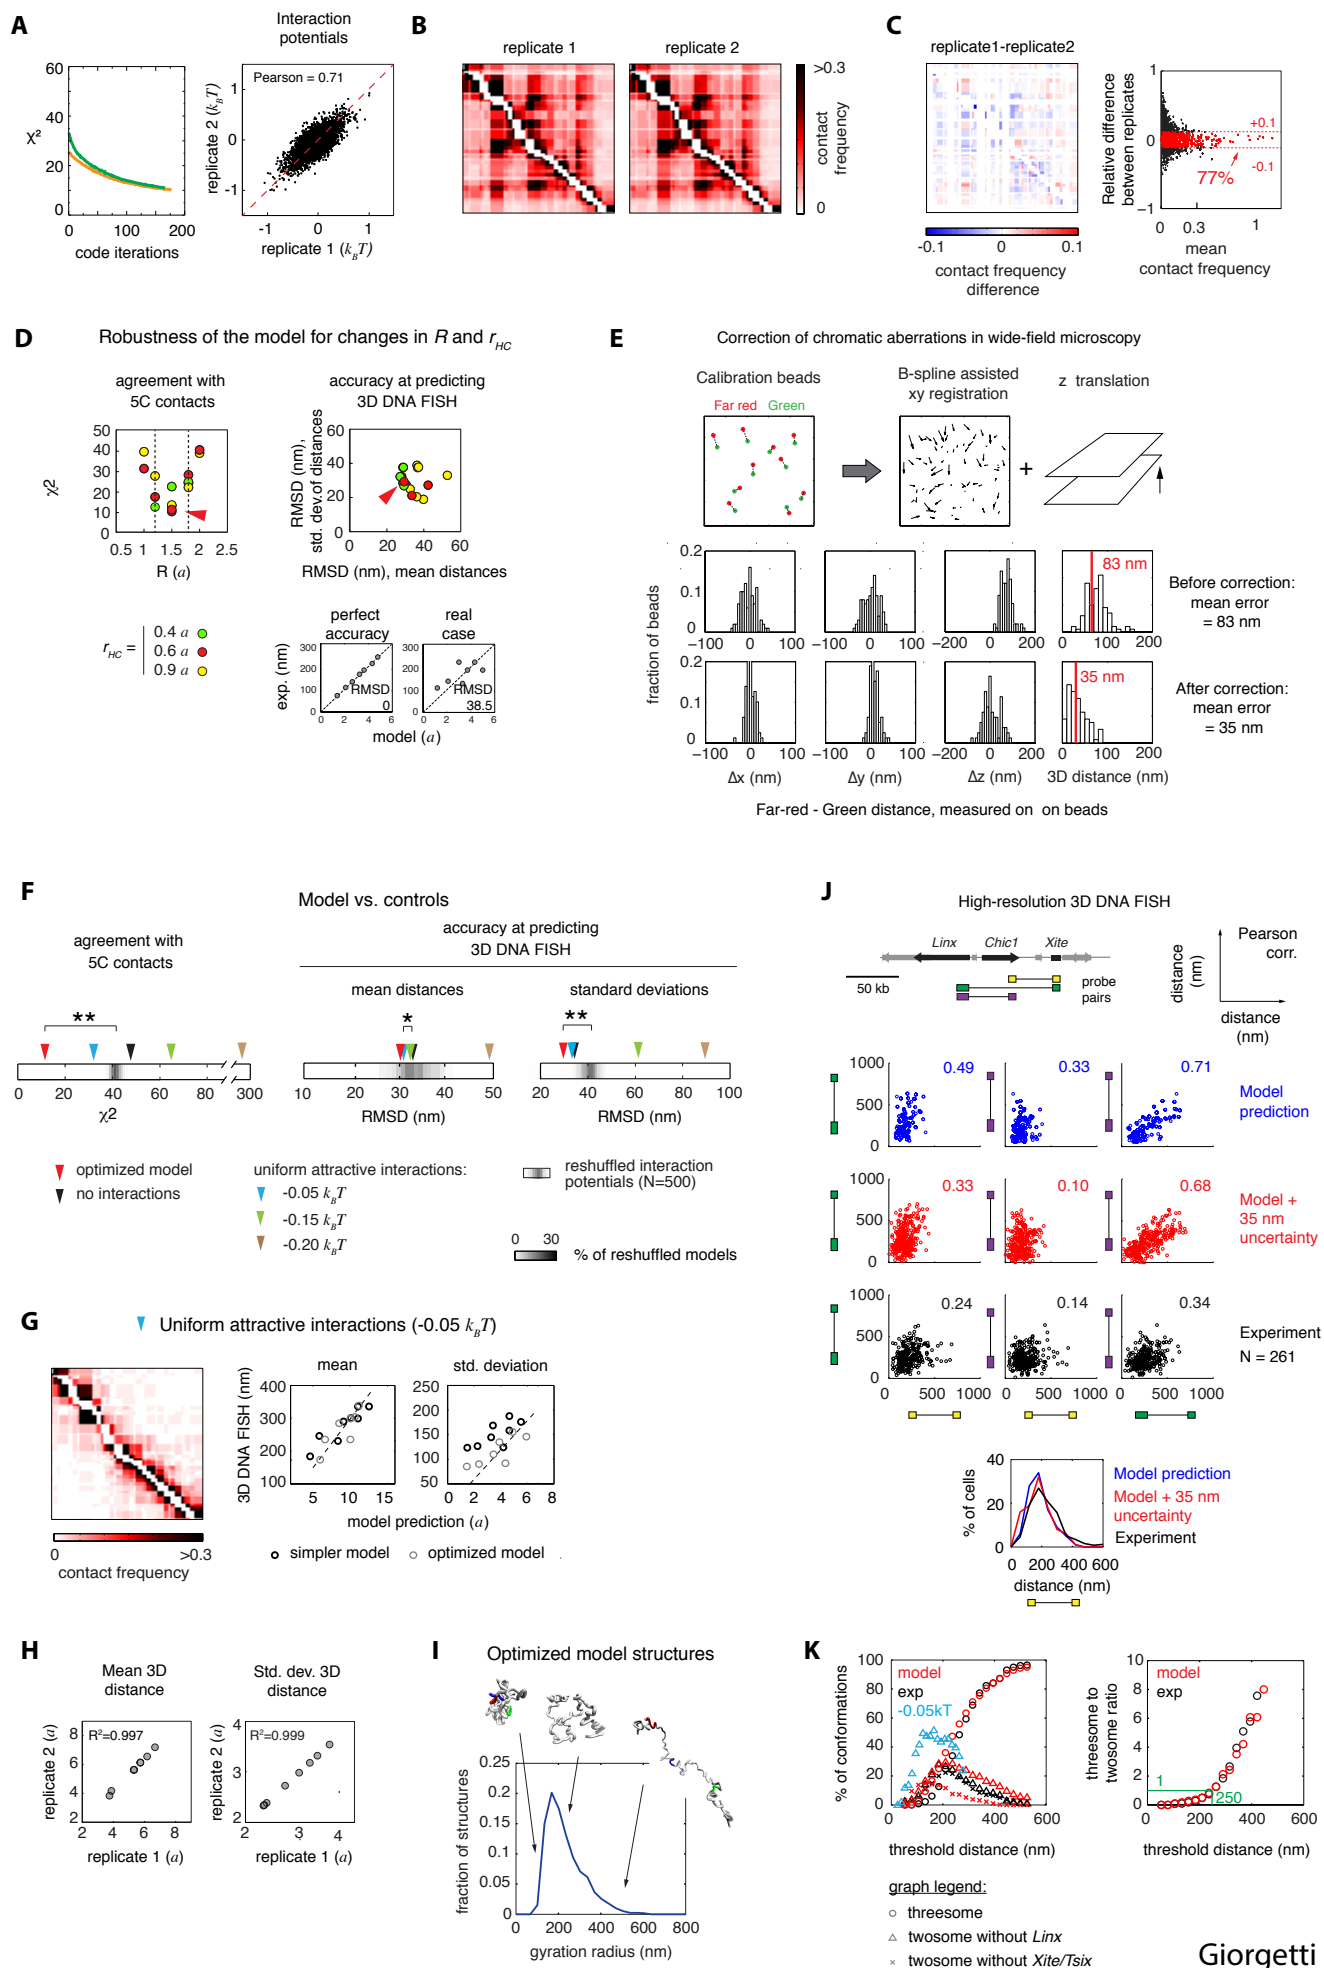

Supplement: NIHMS686568-supplement-Figure_S2.pdf [file NIHMS686568-supplement-Figure_S2.pdf]

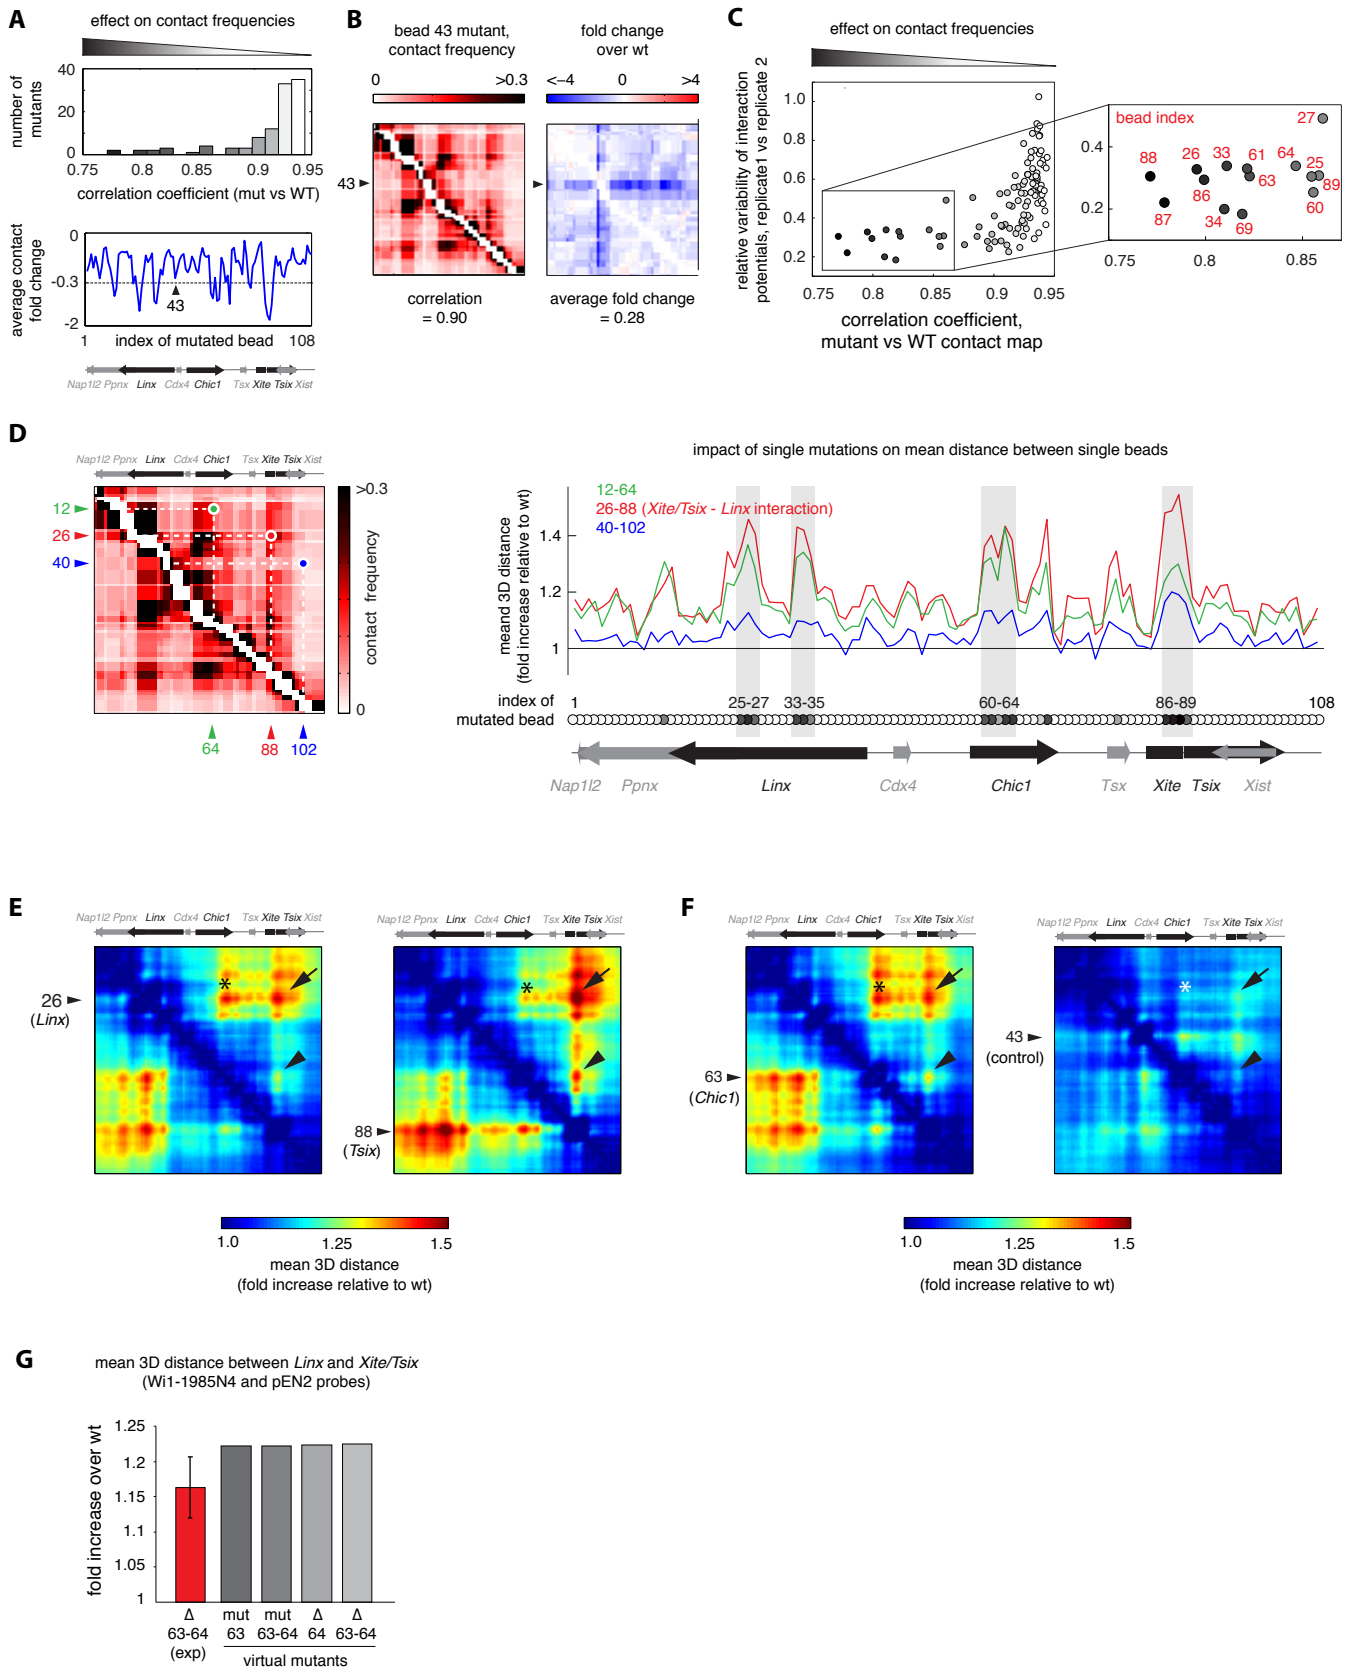

Supplement: NIHMS686568-supplement-Figure_S3.pdf [file NIHMS686568-supplement-Figure_S3.pdf]

**A**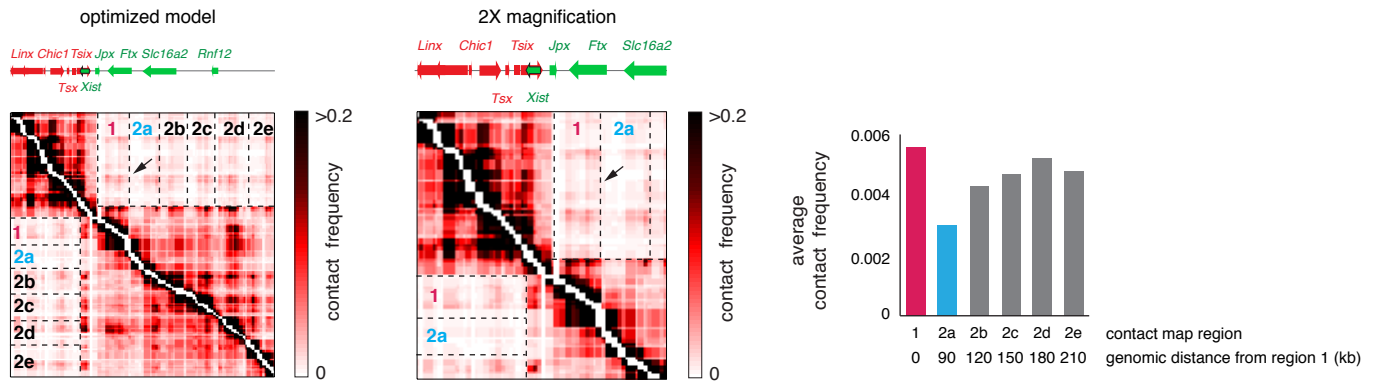

Supplement: NIHMS686568-supplement-Figure_S4.pdf [file NIHMS686568-supplement-Figure_S4.pdf]
